# Supplementary material
Source: publisher figshare collection journal article supplement (https://karger.figshare.com/ndownloader/files/15218180)
Supplement: Supplementary file 1 [file 15218180]

## Supplementary Materials

### *Summary of Eligibility Criteria*

The Period 1 major inclusion criteria were: Japanese men and women aged  $\geq 20$  years; hemodialysis or hemodiafiltration three times per week for at least 12 weeks prior to the start of the screening period (Scr Visit 1); erythropoietin-stimulating agent (ESA) therapy for at least 4 weeks prior to Scr Visit 1; mean hemoglobin (Hb) level at Scr Visit 1 and 2 weeks later (Scr Visit 2) of 9.5–12.0 g/dL with an absolute difference of  $\leq 1.0$  g/dL; and transferrin saturation (TSAT)  $>20\%$  or ferritin  $>75$  ng/mL at either Scr Visit 1.

The Period 1 major exclusion criteria were: concurrent presence of uncontrolled hypertension or severe hepatobiliary disease; onset of myocardial infarction, cerebral infarction, or venous thromboembolism within 24 weeks prior to Scr Visit 1; intact-parathyroid hormone (PTH)  $\geq 500$  pg/mL at Scr Visit 1; receipt of an erythrocyte transfusion or surgery involving massive blood loss in the 12 weeks prior to Scr Visit 1; receipt of intravenous iron therapy in the 4 weeks prior to Scr Visit 1, or initiation of or withdrawn from oral iron therapy or receipt of oral iron therapy at different doses in the 4 weeks prior to Scr Visit 1; receipt of protein anabolic hormones, testosterone enanthate, or mepitiostane in the 12 weeks prior to Scr Visit 1; severe infection, systemic blood disorder, hemolytic anemia, or obvious bleeding lesions such as gastrointestinal hemorrhage; and suspected anemia caused by noninfectious chronic inflammatory disease.

The Period 2 inclusion criteria were: participating in Period 1 and suitable for prolonged receipt of study treatment according to the judgment of the principal investigator or the subinvestigator; and Hb level  $\geq 8.0$  g/dL and  $<13.0$  g/dL at Week 6.

**Table S1. Iron-related parameters at Week 0.**

| Iron-related parameters at Week 0<br>Median (Q1, Q3) | Placebo<br>( <i>n</i> = 22) | Enarodustat<br>2 mg<br>( <i>n</i> = 21) | Enarodustat<br>4 mg<br>( <i>n</i> = 20) | Enarodustat<br>6 mg<br>( <i>n</i> = 22) |
|------------------------------------------------------|-----------------------------|-----------------------------------------|-----------------------------------------|-----------------------------------------|
| Serum iron (µg/dL)                                   | 62.5 (52.0, 76.0)           | 67.0 (54.0, 71.0)                       | 70.5 (57.0, 83.5)                       | 63.5 (52.0, 77.0)                       |
| Ferritin (µg/L)                                      | 81.0 (37.9, 115.0)          | 85.1 (36.5, 166.0)                      | 53.5 (32.1, 80.6)                       | 98.6 (36.7, 169.0)                      |
| Hepcidin (µg/L)                                      | 67.1 (24.6, 127.0)          | 130.0 (38.3, 199.0)                     | 59.9 (26.1, 79.3)                       | 64.9 (37.0, 156.0)                      |
| TIBC (µg/dL)                                         | 248.0 (216.0, 273.0)        | 248.0 (217.0, 262.0)                    | 258.0 (222.5, 275.0)                    | 231.5 (207.0, 250.0)                    |
| TSAT (%)                                             | 23.7 (22.1, 30.0)           | 26.7 (20.2, 33.5)                       | 26.5 (23.1, 30.2)                       | 27.5 (23.3, 35.4)                       |

TIBC, total iron-binding capacity; TSAT, transferrin saturation

**Table S2. Descriptive statistics of EPO and VEGF in Period 1.**

|                |        | Placebo     | Enarodustat<br>2 mg | Enarodustat<br>4 mg | Enarodustat<br>6 mg |
|----------------|--------|-------------|---------------------|---------------------|---------------------|
| EPO<br>(IU/L)  | Week 0 | <i>n</i> 22 | 21                  | 20                  | 22                  |
|                |        | Median      | 20.00               | 17.80               | 19.20               |
|                |        | Q1, Q3      | 14.60, 38.00        | 13.80, 26.90        | 14.90, 30.95        |
|                | Week 2 | <i>n</i> 21 | 18                  | 20                  | 21                  |
|                |        | Median      | 13.30               | 17.95               | 27.30               |
|                |        | Q1, Q3      | 12.10, 16.20        | 12.70, 20.90        | 20.00, 91.35        |
|                | Week 4 | <i>n</i> 21 | 18                  | 18                  | 19                  |
|                |        | Median      | 13.80               | 15.95               | 24.05               |
|                |        | Q1, Q3      | 12.40, 15.50        | 14.30, 19.70        | 16.50, 36.10        |
|                | Week 6 | <i>n</i> 17 | 17                  | 19                  | 15                  |
|                |        | Median      | 14.50               | 18.40               | 22.50               |
|                |        | Q1, Q3      | 13.50, 15.70        | 13.60, 21.10        | 18.80, 33.30        |
| VEGF<br>(ng/L) | Week 0 | <i>n</i> 22 | 21                  | 20                  | 22                  |
|                |        | Median      | 41.95               | 45.70               | 44.80               |
|                |        | Q1, Q3      | 35.00, 56.00        | 38.90, 70.10        | 32.40, 56.15        |
|                | Week 2 | <i>n</i> 21 | 18                  | 20                  | 21                  |
|                |        | Median      | 43.70               | 43.80               | 45.85               |
|                |        | Q1, Q3      | 38.60, 54.90        | 34.70, 50.50        | 39.20, 68.90        |
|                | Week 4 | <i>n</i> 21 | 18                  | 18                  | 19                  |
|                |        | Median      | 45.20               | 46.50               | 49.95               |
|                |        | Q1, Q3      | 42.40, 54.40        | 36.40, 52.70        | 32.40, 53.90        |
|                | Week 6 | <i>n</i> 17 | 17                  | 19                  | 15                  |
|                |        | Median      | 46.10               | 44.20               | 46.00               |
|                |        | Q1, Q3      | 31.50, 55.00        | 37.10, 50.80        | 34.40, 63.60        |
